# Supplementary material for: The INITIATE (Initial Test for Fall Risk Assessment in The Elderly) Prospective Cohort Study: Baseline Results
Source: Research Square preprint supplement (doi:10.21203/rs.3.rs-6490977/v1), 2025-06-10
Supplement: Supplementary file 1 [file 1a9021cb3e8fd1aed0628005.docx]

**Supplemental files**

Table S1. Schedule of data collection and assessments

Table S2. Psychometric properties of balance and mobility tests

Table S3. Psychometric properties of patient reported outcome measures

Supplemental file 1: protocols for physical measures

**Table S1. Schedule of data collection and assessments**

| **Outcomes** | | | **Timelines** | | |
| --- | --- | --- | --- | --- | --- |
| **Baseline** | **Monthly** | **Quarterly** |
| **In person** | Background | Demographics & Socioeconomic Status |  |  |  |
| Physical Measures | Blood Pressure |  |  |  |
| Height |  |  |  |
| Weight |  |  |  |
| Grip Strength |  |  |  |
| Hearing Test |  |  |  |
| Visual Acuity |  |  |  |
| Semmes Weinstein Monofilament Test |  |  |  |
| Pain - Questionnaire | Brief Pain Inventory (BPI) |  |  |  |
| Physical Function - Questionnaires | Pictorial Fit-Frail Scale |  |  |  |
| Late Life FDI |  |  |  |
| Clinical Frailty Scale |  |  |  |
| Executive Function - Questionnaires | Trail Making |  |  |  |
| MoCA Score |  |  |  |
| Performance-Based Tests | Singe Leg Stance |  |  |  |
| TUG – Fast pace |  |  |  |
| Tug Dual Task |  |  |  |
| Chair Rise with Arms |  |  |  |
| Brief BESTest |  |  |  |
| **Phone Call Assessments**  Option to complete structured questionaries either by phone or online | Mobility/ Function | Home Fall Prevention |  |  |  |
| Falls Efficacy Scale International |  |  |  |
| PASE |  |  |  |
| Pre-Clinical Mobility Disability Scale |  |  |  |
| Nutrition | Nutrition Screen II |  |  |  |
| Psycho-social wellbeing | Social Support Survey |  |  |  |
| CES-D |  |  |  |
| Quality of Life | EQ-5D-5L |  |  |  |
| Hearing | Hearing Handicap Inventory (HHIE-S) |  |  |  |
| Neighborhood | NEWS |  |  |  |
| **Monthly Diaries** | Falls | Falls post card (details about postcard, circumstances, severity of injury, healthcare utilization) |  |  |  |
| **Three Month Check-ins** | 3 months f/up | Falls, GRCs, healthcare utilization |  |  |  |

**Table S2. Psychometric properties of balance and mobility tests**

| **Balance and mobility test** | **Cut off times for fall risk** | **MCID** | **Reliability** | **Validity** | **Sensitivity** | **Specificity** |
| --- | --- | --- | --- | --- | --- | --- |
| TUG usual pace | 10-13.5 seconds1-3 | 0.8-1.2 seconds4 | Test-retest: ICC=0.80 (95%CI 0.72 to 0.86)5 | Predictive validity: AUC=0.46-0.93;6-9 Post-test probability of positive test=25-64%2, 10). | 30%-83%6 | 28%-95%6 |
| TUG fast pace |  |  | Inter-rater:  ICC=0.98, (95%CI 0.96 to 0.99)11  Test-retest:  ICC=0.93 to 0.9511 | Fastest trial was most predictive for falls12  Discriminate between indoor and outdoor falls13 |  |  |
| TUG with cognitive dual task14 |  | 2.03 seconds in patients post hip replacement15 | Test-retest: r=0.9814  Intra-rater: ICC=0.9414 | Criterion validity:  Berg Balance Scale, r=-0.6614  Predictive validity: AUC=0.651, p=0.00816 |  |  |
| Brief-BESTest17 | 12.518, 19 | 4.5-5.5 in stroke survivors 18 | Inter-rater ICC=0.93 (95%CI 0.87-0.97)  Test-retest: ICC=0.82 (95%CI 0.65-0.91)18, 19 | Predictive validity: retrospective falls AUC=0.7618, 19  Strong criterion and known group validity, and moderate convergent validity in older adults18 |  |  |
| Chair rise |  | 2-3.7 seconds4, 20 | Test-retest ICC=0.89 (95%CI 0.79-0.95)21 | An inability and those with the greatest time to complete the test significantly predicts injurious falls (HR=2.11, 95%CI:1.23–3.62, p=0.01).22, 23  The test was able to discriminate between those with and without a balance disorder: AUC=0.75, (95% CI=.68–.82)24; OR=2.40 (95%CI 1.43 to 3.03).21 |  |  |
| Single leg stance (mean) | <5-7.6 seconds10, 25 | 2 seconds.26 | Test-retest ICC=0.78 to 0.825, 27 | Predictive validity  AUC=0.527-0.5628 | 33%-56%10, 25 | 58%-71%10, 25 |
| Gait speed | 1m/s-0.8m/s3, 29 | 0.1 metre/second in older adults4, 26 |  | Predictive validity  AUCs =0.57 to 0.6430, 31 |  |  |
| Notes. 95%CI = 95% confidence interval; AUC = area under the curve; ICC = intraclass correlations; MCID = minimal clinically important difference; | | | | | | |

**Table S3. Psychometric properties of patient reported outcome measures**

| **Survey Name** | **Instructions & Description** | **Scoring** | **Psychometric Properties** |
| --- | --- | --- | --- |
| Demographics, medical background, healthcare utilization, socioeconomic status | Multiple choice survey, collects data on: Age, sex/gender, birth country, race, ethnicity, smoking status, alcohol, balance, fall history, fear of falling, medications, nutritional supplements, cannabis use, comorbidities, general health, marital status, socioeconomic questions, education, income, house/living situation | NA | NA |
| Brief Pain Inventory (BPI)32 | Numerical pain intensity scales examining perceived pain severity and perceived pain interference on activities of daily living | Item count: 11 items, rated from 0(no pain) to 10 (pain as bad as you can imagine)  Scoring:  1) Pain Severity Score:  Sum the scores for questions 3, 4, 5, and 6 and then divide by 4. Giving a severity score out of 10  2) Pain Interference Score:  Sum the scores for questions 8a, b, c, d, e, f, and g and then divide by 7. Giving an interference score out of 10  Interpretation: greater scores indicate greater pain severity and interference | Population: osteoarthritis and musculoskeletal pain patients33  Test-retest reliability: ICC=0.83  Known-group validity: Discriminates between elderly patients with mixed MSK conditions into known groups of recurrent fallers and non-fallers (AUC, 0.72 to 0.73)33  Criterion-convergent validity:  low to moderate correlation with WOMAC, Roland Morris Disability questionnaire, Oswestry Disability index (r=0.3-0.69)33 |
| Pictorial Fit-Frailty Scale34 | Pictorial scale assessing mobility, function, balance, medication, mood, social connections, tiredness, memory , vision, hearing, pain, weight loss, aggression, bladder control | Item count: 14 items, rated visually from 0 (no impairment) to a maximum between 2-5 (maximum impairment)  Scoring: sum total scores from 0-43  Interpretation:  greater scores indicate greater frailty severity | Population: day-hospital patients,34 veterans35  Test-retest reliability: ICC=0.78 (95%CI 0.67 to 0.86)34  Validity: positive correlations with the FRAIL scale (r=0.673, 95% CI: 0.509–0.836, p < .001)35  Predictive accuracy for frailty (AUC=0.737; 95% CI 0.629 to 0.844)35 |
| Late Life Function and Disability Instrument36, 37 | Assesses overall physical function and disability. The function component also consists of 3 subscales: upper, lower and advanced lower extremity. The disability component is comprised of frequency of participation ( 2 subscales – personal role, social role) and limitation ( 2 subscales – instrumental role, management role) | Item count:  1) Physical function, 32 items, rated from 5 (no difficulty completing task) to 1(cannot do a task)  2) Disability: 32 items assessing:  a) frequency of participating in life tasks - 16 items; rated from 5(very often) to 1(never) and;  b) limitation in life tasks (16 items; rated from 5(not at all limited) to 1(completely limited)    Scoring:  1) Physical function: 0-100; this is a weighted score calculated from the sum of the 32 items  2) Disability: both frequency and limitation scores are calculated from the sum of the 16 items respectively and converted to scores out of 100  Interpretation: higher weighted scores indicate greater function and low levels of disability | Population: community dwelling older adults 36, 37  Reliability:  1) Function: test-retest ICC=0.91-.9836  2) Disability: test-retest ICC = (ICC .68 –.82)37  Validity:  1) Function correlated to the TUG (r=−0.34 to −0.71)36  2) Disability demonstrated known-groups validity between subgroups of different functional limitations37 |
| Clinical Frailty Scale38 | Completed by the assessors, the scale categorizes participants’ degree of fitness or frailty | Item options: 1 item, rated from 1 (very fit) to 9 (terminally ill)  Scoring: range from 1 (very fit) to 9 (terminally ill)  Interpretation: greater score indicates greater frailty risk and/or end of life | Population: community dwelling older adults (65+), emergency department older adult patients  Inter-rater reliability: moderate to strong agreement between pairs of doctors, nurses, and physiotherapists (weighted-kappa=0.59-0.88)39  Convergent validity: moderate correlation with the Frailty Phenotype Criteria (r=0.69, p<.01)40 and strong correlation with the Frailty Index (r=0.80)38 |
| Trail Making41 | A task-based test assessing executive function, specifically mental flexibility | Procedures:  Task A: connect 25 numbers in ascending order  Task B: alternately connect 13 numbers and 12 letters in ascending order as quickly as possible  Scoring: time to complete each test is recorded. The difference between Task A and Task B is also used  Interpretation: greater scores on each task indicate poorer executive function. Greater time differences between tasks indicate poorer mental flexibility | Population: neurological assessment patients (15-79)  Test-retest reliability: Part A (r=0.70), Part B (r=0.78)41  Convergent validity: moderate correlation with other impairment scales (0.67 to 0.69 for Part A; 0.77 to 0.78 for Part B)41 |
| Montreal Cognitive Assessment (V.8.1)42 | Cognitive screening test assessing orientation and attention, memory, language, visuospatial skills, executive function, verbal fluency and abstract thought | Item count: 15 items in 8 domains,  Scoring: all items are scored individually, then summed, with scores ranging from 0 to 30. An extra point is added if participants have <12 years education.  Interpretation: scores 26/30 are considered normal mental state | Population: elderly inpatients  Test-retest reliability: ICC=0.9242  Content validity: high correlation with the Mini Mental State Exam (r=0.87, p<.001)42 |
| CDC: Home Fall Prevention Checklist43 | An unvalidated checklist to assess for hazards in the home as part of the STEADI initiative | Item count: 16 items across 5 domains  Scoring: sum up the items  Interpretation: greater scores indicate greater fall risk | NA |
| Falls Efficacy Scale International44 | Assesses fear of falling (FOF) | Item count: 16 items rated based on level of concern about the possibility of falling while completing the activity ranging from 1(not at all concerned) to 4 (very concerned).  Scoring: sum all items, total scores range from 16–64  Interpretation: higher scores represent greater FOF, with potential thresholds ranging from 16-19 (no FOF), 20-27 (moderate FOF), and ≥ 28 (high FOF) | Population: general geriatric patients  Test-retest reliability: ICC=0.9644  Discriminant validity: Scores were significantly different between demographic characteristics and fall risk factors44 |
| The Physical Activity Scale for the Elderly45 | Assess physical activity behaviours in older adults | Item count: 10 items, each item assesses frequency from 0 (never) to 3 (often), duration (time spent), and intensity level (light or heavy) of leisure, household, and occupational activities.  Scoring: items are scored based on a weighted algorithm. Provides a weighted total score of 0-400 representing the level of physical activity.  Interpretation: higher scores indicate greater physical activity levels | Population: random sample of older adults(65)  Test-retest reliability: ICC=0.75 (95% CI 0.69-0.80)45  Convergent validity: associated with grip strength (*r*=0.37), static balance (*r*=0.33), and leg strength (*r*=0.25)45 |
| Pre-Clinical Mobility Disability Scale46 | Identifies individuals at-risk for future mobility limitations, examining three mobility tasks: walking 0.5 km, walking 2km, and climbing 1 flight of stairs | Item count: 3 items, each item represents a mobility task rated from 1 (able to manage without difficulty) to 5 (unable to manage with help).  Scoring: 1 to 5; each item is scored individually, no total score.  Interpretation: higher scores indicate greater potential limitations. | Population: community dwelling older adults  Test-retest reliability: agreement for the items ranged between 93 to 100% for each task46  Criterion validity: participants with no limitation had significantly (p<0.05) faster walking speed and higher muscle power compared with those with preclinical mobility limitation46 |
| Seniors in the community: risk evaluation for eating and nutrition, Version II (Nutrition Screen II)47 | Assesses for nutritional risk in community dwelling older adults | Item count: 8-items, individually scored  Scoring: total scores range from 0-48  Interpretation: Higher scores indicate lower nutrition risk. A cut point of <38 is established for those at greatest nutritional risk | Population: Seniors living in the community8  Test re-test reliability: ICC =0.84, (95%CI 0.79 to 0.89)47  Construct validity: For the cut point of <38, the AUC was 77% when compared against dietitian risk rating47 |
| Medical Outcomes Study-Social Support Survey48 | Examines four types of social support (emotional/informational support; tangible support; affectionate support; positive social interaction) and an overall functional social support index | Item count: 19 items, rated from 0(none of the time) to 5(all of the time)  Scoring:  1) Overall support index: calculate the average of all 19 items. This can be transformed into a scale from 0-100  2) Each subscale: calculate the average for each of the scores  Interpretation: a higher score for the subscale or for the overall support index indicates greater support | Population: general population  Internal consistency reliability:  Cronbach alpha=0.91-0.97  Convergent validity:  convergent validity relationship with expected scales (rho exceeding 0.72)48 |
| Center for Epidemiologic Studies Depression Scale (CES-D)49 | A self-report screening tool for depression that captures depressive feelings, loneliness, restless sleep, and hopefulness. | Item count: 20 items; rated from 0 (rarely) to 3 (most or all of the time), with positively framed items reverse coded.  Score range: 0-30; sum the 10 items for a total score.  Interpretation: higher scores indicate greater symptoms of depression severity. Commonly used cut off score are ≥ 16 indicates patient is at risk for depression | Population: general population samples  Test-retest reliability: r=0.45-0.7049  Criterion validity: moderate correlation scales measuring symptoms of depression (r=0.51-0.61)49 |
| EQ-5D-5L50, 51 | Assesses quality of life in 5 different domains (Mobility, Self-care, Usual activities, Pain/Discomfort, and Anxiety/Depression) and a Visual Analog Scale item that assesses overall quality of life | Items count: 6 items, rated from 1 (High QoL) to 5 (low QoL)  Scoring: 1-5 for each domain, rated individually. 0-100 for the overall health item  Interpretation: higher scores in each domain indicates poorer quality of life in that domain, higher scores in the overall health item indicates greater health | Population: individuals >40 and 65-74, 75+  Known group validity: all 3L and 5L correlations were in the expected direction50, 51 |
| Hearing Handicap Inventory (HHIE-S)52 | Screens for hearing impairment and assesses social and emotional factors associated with hearing impairment | Item count: 10 items; each item is rated from "yes" (4 points), "sometimes" (2 points), and "no" (0 points)  Scoring 0-40; sum the 10 items for a total score  Interpretation: Higher scores indicate a greater hearing handicap. Cut off scores >8 indicate hearing handicap. | Population: community dwelling older adults  Test-retest reliability: ICC=0.8552  Criterion validity: correlation with pure-tone audiometry r=0.69 (p<0.01)52 |
| Neighborhood environment walkability scale (NEWS)53 | Assesses overall neighborhood perceptions related to physical activity (residential density, land use mix, street connectivity, infrastructure for walking cycling, neighborhood aesthetics, traffic and crime safety, neighborhood satisfaction) | Item count: 98 items, each item is rated individually, with some items reverse coded  Scoring: for each subscale, there are different scoring instructions, with weights applied  Interpretation: greater scores indicate greater walkability | Population: community dwelling adults  Test-retest reliability:  Conducted for each subscale, ranges from ICC=0.58-0.8053  Construct validity: the survey was able to discern between low and high walkable neighborhoods53 |
| Global rating of change questions54 | Assesses if participants have experienced any changes in their ability to 1) move around their home, 2) engage in housework, 3) engage in physical activity | Item count: 3 items, rated from (much worse) to 5 (much better)  Score range: 1-5 per question  Interpretation: greater scores indicate better mobility | NA |

**Supplemental file 1. Protocols for physical measures**

**Blood Pressure.** We assessed blood pressure using a VSM bpTRU machine. Participants were seated and the left arm was used as the default. If any contraindications with the left arm, we used the right arm. Three measurements were taken, and we made use of the average of the last two measurements. Blood pressure is an indicator for falls among older adults, with studies suggesting a U-curve association where both those with very high and very low blood pressure are at an increased risk for falls.55-57

**Body Mass Index.** To calculate body mass index (BMI), both height and weight were measured at the study visit. Height was measured in centimetres, with the assessor taking two measurements and averaging them. Weight was taken in kilograms. BMI was calculated using the standard formula of weight (kg) divided by height (metres) squared. Greater BMI is consistently associated with increased fall risk,58-60 with potential differences between men and women.58, 61 There is also promising evidence suggesting a U-shaped curve, where those with high and low BMI have greater fall risk.62

**Grip Strength.** Grip Strength was measured using a Tracker Freedom Wireless Grip dynamometer. Participants were asked to sit with their feet flat on the floor, with their dominant arm at 90 degrees not resting on anything. They then executed a maximum grip three times. The mean and maximum grip strength were recorded. No practice trial was given. Grip strength has an excellent test-retest reliability (ICC=0.95, 95%CI 0.92-0.97)5, has shown a clear association with the chair stand63 and predicts future disability among older adults.64 Grip strength has also demonstrated associations with falls in multiple cross-sectional studies,65, 66 however this has not yet been prospectively examined.

**Hearing Audiometry.** Using a Tremetric RA3000 audiometer, participants underwent a hearing test to determine the lowest sound they could hear. The audiometer delivered three pulsed sounds, and the participant were asked to press a button at any point during the beeping that they could hear. The test measured between 500-8000hz delivered at 40dB. Hearing impairment has been identified as a modifiable risk factor, as it is highly prevalent yet treatable,67 and is associated with reduced physical function68 and greater odds of falling60, 69 among older adults.

**Visual Acuity.** Visual Acuity was measured using an ETDRS Chart at a distance of 20 feet. Vision was measured for single eye (left, right), pinhole (left, right), and both eyes together. Vision impairment is a suspected risk factor for falls among older adults and contributes to postural and balance impairments.60, 70 Scoring was calculated using the ETDRS Acuity Log Score.

**Foot Sensation.** To assess tactile sensitivity in the foot, we used the Semmes Weinstein Monofilament Test (SWMT). The SWMT applies a 5.07/10g monofilament apparatus (Neuropen peripheral neuropathy screening device) at 90 degrees across 10 sites on the plantar and ventral aspect of the participant’s foot. If the participant can feel the monofilament, they are asked to respond with “yes”, if not, they are asked to respond with “no”. In the event a participant cannot feel the monofilament, we tested the same site three times and if they felt the sensation at any point, we marked it as a positive test. The inability to sense the touch of the filament at more than 7 sites would indicate a high risk of falls.71 The starting foot was randomly selected to avoid order effect. Tactile sensitivity, in particular light touch, has been associated with fallers,71-73 and the SWMT demonstrates good repeatability.74

References

1. Centers for Disease Control and Prevention. STEADI (Stopping Elderly Accidents, Deaths and Injuries) Tool Kit for Health Care Providers: Centers for Disease Control and Prevention, National Center for Injury Prevention and Control, Division of Unintentional Injury Prevention; 2014 [updated June 29, 2015. Available from: <http://www.cdc.gov/steadi/index.html>.

2. Barry E, Galvin R, Keogh C, et al. Is the Timed Up and Go test a useful predictor of risk of falls in community dwelling older adults: A systematic review and meta-analysis. *BMC Geriatr* 2014;**14**:1-14.

3. Montero-Odasso M, Van Der Velde N, Martin FC, et al. World guidelines for falls prevention and management for older adults: a global initiative. *Age and ageing* 2022;**51**:afac205.

4. Bennell K, Dobson F, Hinman R. Measures of physical performance assessments: self-paced walk test (SPWT), stair climb test (SCT), six-minute walk test (6MWT), chair stand test (CST), timed up & go (TUG), sock test, lift and carry test (LCT), and car task. *Arthritis Care Res* 2011;**63**:S350-S70.

5. Beauchamp MK, Hao Q, Kuspinar A, et al. Reliability and Minimal Detectable Change Values for Performance-Based Measures of Physical Functioning in the Canadian Longitudinal Study on Aging. *The Journals of Gerontology: Series A Biological Sciences and Medical Sciences* 2021;**76**:2030-8.

6. Meekes WM, Korevaar JC, Leemrijse CJ, et al. Practical and validated tool to assess falls risk in the primary care setting: a systematic review. *BMJ Open* 2021;**11**:e045431.

7. Viccaro LJ, Perera S, Studenski SA. Is timed up and go better than gait speed in predicting health, function, and falls in older adults? *Journal of the American Geriatrics Society* 2011;**59**:887-92.

8. Park SH. Tools for assessing fall risk in the elderly: a systematic review and meta-analysis. *Aging clinical and experimental research* 2017.

9. Beauchet O, Fantino B, Allali G, et al. Timed Up and Go test and risk of falls in older adults: a systematic review. *J Nutr Health Aging* 2011;**15**:933-8.

10. Lusardi MM, Fritz S, Middleton A, et al. Determining risk of falls in community dwelling older adults: a systematic review and meta-analysis using posttest probability. *J Geriatr Phys Ther* 2017;**40**:1.

11. Gafner SC, Allet L, Hilfiker R, et al. Reliability and Diagnostic Accuracy of Commonly Used Performance Tests Relative to Fall History in Older Persons: A Systematic Review. *Clin Interv Aging* 2021;**16**:1591-616.

12. Bloch ML, Jønsson LR, Kristensen MT. Introducing a third timed up & go test trial improves performances of hospitalized and community-dwelling older individuals. *J Geriatr Phys Ther* 2017;**40**:121.

13. Schoene D, Wu SMS, Mikolaizak AS, et al. Discriminative ability and predictive validity of the timed Up and Go test in identifying older people who fall: systematic review and meta‐analysis. *Journal of the American Geriatrics Society* 2013;**61**:202-8.

14. Hofheinz M, Schusterschitz C. Dual task interference in estimating the risk of falls and measuring change: a comparative, psychometric study of four measurements. *Clinical rehabilitation* 2010;**24**:831-42.

15. Uysal İ, Özden F, Yalçın M, et al. The effect of dual-task training in older adults with total hip arthroplasty: A randomized controlled trial. *BMC Musculoskelet Disord* 2025;**26**:29.

16. Hofheinz M, Mibs M. The Prognostic Validity of the Timed Up and Go Test With a Dual Task for Predicting the Risk of Falls in the Elderly. *Gerontology & geriatric medicine* 2016;**2**:2333721416637798.

17. Padgett PK, Jacobs JV, Kasser SL. Is the BESTest at its best? A suggested brief version based on interrater reliability, validity, internal consistency, and theoretical construct. *Phys Ther* 2012;**92**:1197-207.

18. Lo CW, Lin C-Y, Tsang WW, et al. Psychometric properties of brief-balance evaluation systems test among multiple populations: A systematic review and meta-analysis. *Arch Phys Med Rehabil* 2022;**103**:155-75. e2.

19. Marques A, Almeida S, Carvalho J, et al. Reliability, Validity, and Ability to Identify Fall Status of the Balance Evaluation Systems Test, Mini-Balance Evaluation Systems Test, and Brief-Balance Evaluation Systems Test in Older People Living in the Community. *Arch Phys Med Rehabil* 2016;**97**:2166-73 e1.

20. Longhurst J, Phan J, Chen E, et al. Physical therapy for gait, balance, and cognition in individuals with cognitive impairment: A retrospective analysis. *Rehabil Res Pract* 2020;**2020**:8861004.

21. Tiedemann A, Shimada H, Sherrington C, et al. The comparative ability of eight functional mobility tests for predicting falls in community-dwelling older people. *Age and ageing* 2008;**37**:430-5.

22. Shea CA, Ward RE, Welch SA, et al. Inability to Perform the Repeated Chair Stand Task Predicts Fall-Related Injury in Older Primary Care Patients. *Am J Phys Med Rehabil* 2018;**97**:426-32.

23. Ward RE, Leveille SG, Beauchamp MK, et al. Functional performance as a predictor of injurious falls in older adults. *Journal of the American Geriatrics Society* 2015;**63**:315-20.

24. Whitney SL, Wrisley DM, Marchetti GF, et al. Clinical measurement of sit-to-stand performance in people with balance disorders: validity of data for the Five-Times-Sit-to-Stand Test. *Phys Ther* 2005;**85**:1034-45.

25. Power V, Van De Ven P, Nelson J, et al. Predicting falls in community-dwelling older adults: a systematic review of task performance-based assessment tools. *Physiotherapy Practice and Research* 2014;**35**:3-15.

26. Dohrn M, Hagströmer M, Hellénius M-L, et al. Short-and long-term effects of balance training on physical activity in older adults with osteoporosis: A randomized controlled trial. *J Geriatr Phys Ther* 2017;**40**:102-11.

27. Hao Q, Kuspinar A, Griffith L, et al. Measuring physical performance in later life: reliability of protocol variations for common performance-based mobility tests. *Aging clinical and experimental research* 2023;**35**:1087-96.

28. Omaña H, Bezaire K, Brady K, et al. Functional Reach Test, Single-Leg Stance Test, and Tinetti Performance-Oriented Mobility Assessment for the Prediction of Falls in Older Adults: A Systematic Review. *Phys Ther* 2021;**101**.

29. Beck Jepsen D, Robinson K, Ogliari G, et al. Predicting falls in older adults: an umbrella review of instruments assessing gait, balance, and functional mobility. *BMC geriatrics* 2022;**22**:615.

30. Bongers KTJ, Schoon Y, Graauwmans MJ, et al. The predictive value of gait speed and maximum step length for falling in community-dwelling older persons. *Age and ageing* 2014;**44**:294-9.

31. Beauchamp MK, Kuspinar A, Sohel N, et al. Mobility screening for fall prediction in the Canadian Longitudinal Study on Aging (CLSA): implications for fall prevention in the decade of healthy ageing. *Age and ageing* 2022;**51**:afac095.

32. Cleeland C, Ryan K. Pain assessment: global use of the Brief Pain Inventory. *Annals, Academy of Medicine, Singapore* 1994.

33. Jumbo SU, MacDermid JC, Kalu ME, et al. Measurement properties of the Brief Pain Inventory-Short Form (BPI-SF) and revised Short McGill Pain Questionnaire Version-2 (SF-MPQ-2) in pain-related musculoskeletal conditions: a systematic review. *Clin J Pain* 2021;**37**:454-74.

34. McGarrigle L, Squires E, Wallace LMK, et al. Investigating the feasibility and reliability of the Pictorial Fit-Frail Scale. *Age and ageing* 2019;**48**:832-7.

35. Ysea-Hill O, Sani TN, Nasr LA, et al. Concurrent Validity of Pictorial Fit-Frail Scale (PFFS) in Older Adult Male Veterans with Different Levels of Health Literacy. *Gerontology and Geriatric Medicine* 2021;**7**:23337214211003804.

36. Haley SM, Jette AM, Coster WJ, et al. Late Life Function and Disability Instrument: II. Development and evaluation of the function component. *The Journals of Gerontology Series A: Biological Sciences and Medical Sciences* 2002;**57**:M217-M22.

37. Jette AM, Haley SM, Coster WJ, et al. Late life function and disability instrument: I. Development and evaluation of the disability component. *The Journals of Gerontology Series A: Biological Sciences and Medical Sciences* 2002;**57**:M209-M16.

38. Rockwood K, Song X, MacKnight C, et al. A global clinical measure of fitness and frailty in elderly people. *CMAJ* 2005;**173**:489-95.

39. Pugh R, Battle C, Thorpe C, et al. Reliability of frailty assessment in the critically ill: a multicentre prospective observational study. *Anaesthesia* 2019;**74**:758-64.

40. Islam A, Muir-Hunter S, Speechley M, et al. Facilitating Frailty Identification: Comparison of Two Methods among Community-Dwelling Order Adults. *J Frailty Aging* 2014;**3**:216-21.

41. Franzen MD, Paul D, Iverson GL. Reliability of alternate forms of the trail making test. *Clin Neuropsychol* 1996;**10**:125-9.

42. Nasreddine ZS, Phillips NA, Bédirian V, et al. The Montreal Cognitive Assessment, MoCA: a brief screening tool for mild cognitive impairment. *Journal of the American Geriatrics Society* 2005;**53**:695-9.

43. Centers for Disease Control and Prevention. Check for Safety: A home fall prevention checklist for older adults. 2015.

44. Yardley L, Beyer N, Hauer K, et al. Development and initial validation of the Falls Efficacy Scale-International (FES-I). *Age and ageing* 2005;**34**:614-9.

45. Washburn RA, Smith KW, Jette AM, et al. The Physical Activity Scale for the Elderly (PASE): development and evaluation. *J Clin Epidemiol* 1993;**46**:153-62.

46. Mänty M, Heinonen A, Leinonen R, et al. Construct and predictive validity of a self-reported measure of preclinical mobility limitation. *Arch Phys Med Rehabil* 2007;**88**:1108-13.

47. Keller H, Goy R, Kane S. Validity and reliability of SCREEN II (Seniors in the community: risk evaluation for eating and nutrition, Version II). *Eur J Clin Nutr* 2005;**59**:1149-57.

48. Sherbourne CD, Stewart AL. The MOS social support survey. *Soc Sci Med* 1991;**32**:705-14.

49. Radloff LS. The CES-D scale: A self-report depression scale for research in the general population. *Appl Psychol Meas* 1977;**1**:385-401.

50. Herdman M, Gudex C, Lloyd A, et al. Development and preliminary testing of the new five-level version of EQ-5D (EQ-5D-5L). *Qual Life Res* 2011;**20**:1727-36.

51. Janssen M, Pickard AS, Golicki D, et al. Measurement properties of the EQ-5D-5L compared to the EQ-5D-3L across eight patient groups: a multi-country study. *Qual Life Res* 2013;**22**:1717-27.

52. Tomioka K, Ikeda H, Hanaie K, et al. The Hearing Handicap Inventory for Elderly-Screening (HHIE-S) versus a single question: reliability, validity, and relations with quality of life measures in the elderly community, Japan. *Qual Life Res* 2013;**22**:1151-9.

53. Saelens BE, Sallis JF, Black JB, et al. Neighborhood-based differences in physical activity: an environment scale evaluation. *Am J Public Health* 2003;**93**:1552-8.

54. Beauchamp MK, Vrkljan B, Kirkwood R, et al. Impact of COVID-19 on mobility and participation of older adults living in Hamilton, Ontario, Canada: a multimethod cohort design protocol. *BMJ Open* 2021;**11**:e053758.

55. Mol A, Bui Hoang PTS, Sharmin S, et al. Orthostatic Hypotension and Falls in Older Adults: A Systematic Review and Meta-analysis. *J Am Med Dir Assoc* 2019;**20**:589-97.e5.

56. Klein D, Nagel G, Kleiner A, et al. Blood pressure and falls in community-dwelling people aged 60 years and older in the VHM&PP cohort. *BMC Geriatr* 2013;**13**:1-7.

57. Song Y, Deng Y, Li J, et al. Associations of falls and severe falls with blood pressure and frailty among Chinese community-dwelling oldest olds: The Chinese Longitudinal Health and Longevity Study. *Aging (Albany NY)* 2021;**13**:16527-40.

58. Zhao X, Yu J, Hu F, et al. Association of body mass index and waist circumference with falls in Chinese older adults. *Geriatric nursing* 2022;**44**:245-50.

59. Nakamura K, Kitamura K, Watanabe Y, et al. Body mass index and risk of recurrent falls in community‐dwelling Japanese aged 40–74 years: The Murakami cohort study. *Geriatrics & Gerontology International* 2021;**21**:498-505.

60. Deandrea S, Lucenteforte E, Bravi F, et al. Risk factors for falls in community-dwelling older people:" a systematic review and meta-analysis". *Epidemiology* 2010:658-68.

61. Handrigan G, Maltais N, Gagné M, et al. Sex-specific association between obesity and self-reported falls and injuries among community-dwelling Canadians aged 65 years and older. *Osteoporosis International* 2017;**28**:483-94.

62. Trevisan C, Crippa A, Ek S, et al. Nutritional Status, Body Mass Index, and the Risk of Falls in Community-Dwelling Older Adults: A Systematic Review and Meta-Analysis. *J Am Med Dir Assoc* 2019;**20**:569-82.e7.

63. Hardy R, Cooper R, Aihie Sayer A, et al. Body mass index, muscle strength and physical performance in older adults from eight cohort studies: the HALCyon programme. *PloS One* 2013;**8**:e56483.

64. Bohannon RW. Grip Strength: An Indispensable Biomarker For Older Adults. *Clin Interv Aging* 2019;**14**:1681-91.

65. Yang N-P, Hsu N-W, Lin C-H, et al. Relationship between muscle strength and fall episodes among the elderly: the Yilan study, Taiwan. *BMC Geriatr* 2018;**18**:90.

66. Hoda W, Samia A-R, Ahmed M. Handgrip strength and falls in community-dwelling Egyptian seniors. *Adv Aging Res* 2013;**2013**.

67. Lin FR, Ferrucci L. Hearing Loss and Falls Among Older Adults in the United States. *Arch Intern Med* 2012;**172**:369-71.

68. Agmon M, Lavie L, Doumas M. The association between hearing loss, postural control, and mobility in older adults: a systematic review. *J Am Acad Audiol* 2017;**28**:575-88.

69. Jiam NTL, Li C, Agrawal Y. Hearing loss and falls: A systematic review and meta‐analysis. *Laryngoscope* 2016;**126**:2587-96.

70. Lord SR, Smith ST, Menant JC. Vision and falls in older people: risk factors and intervention strategies. *Clin Geriatr Med* 2010;**26**:569-81.

71. Yang F. Identification of Optimal Foot Tactile Sensation Threshold for Detecting Fall Risk Among Community-Dwelling Older Adults. *Phys Ther* 2021;**101**.

72. Carrer P, Trevisan C, Curreri C, et al. Semmes-Weinstein Monofilament Examination for Predicting Physical Performance and the Risk of Falls in Older People: Results of the Pro.V.A. Longitudinal Study. *Arch Phys Med Rehabil* 2018;**99**:137-43.e1.

73. Lipsitz LA, Manor B, Habtemariam D, et al. The pace and prognosis of peripheral sensory loss in advanced age: association with gait speed and falls. *BMC Geriatr* 2018;**18**:274.

74. Bell-Krotoski J, Tomancik E. The repeatability of testing with Semmes-Weinstein monofilaments. *J Hand Surg Am* 1987;**12**:155-61.
